# Supplementary material for: Y90-radioembolisation in hepatocellular carcinoma induces immune responses calling for early treatment with multiple checkpoint blockers
Source: PubMed Central journal article supplement — Gut. 2022 May 4;72(2):406–7. doi: 10.1136/gutjnl-2021-326869 (PMC9872224; doi:10.1136/gutjnl-2021-326869), 2022-05-04
Supplement: gutjnl-2021-326869supp001.pdf [file gutjnl-2021-326869supp001.pdf]

## Supplementary figure

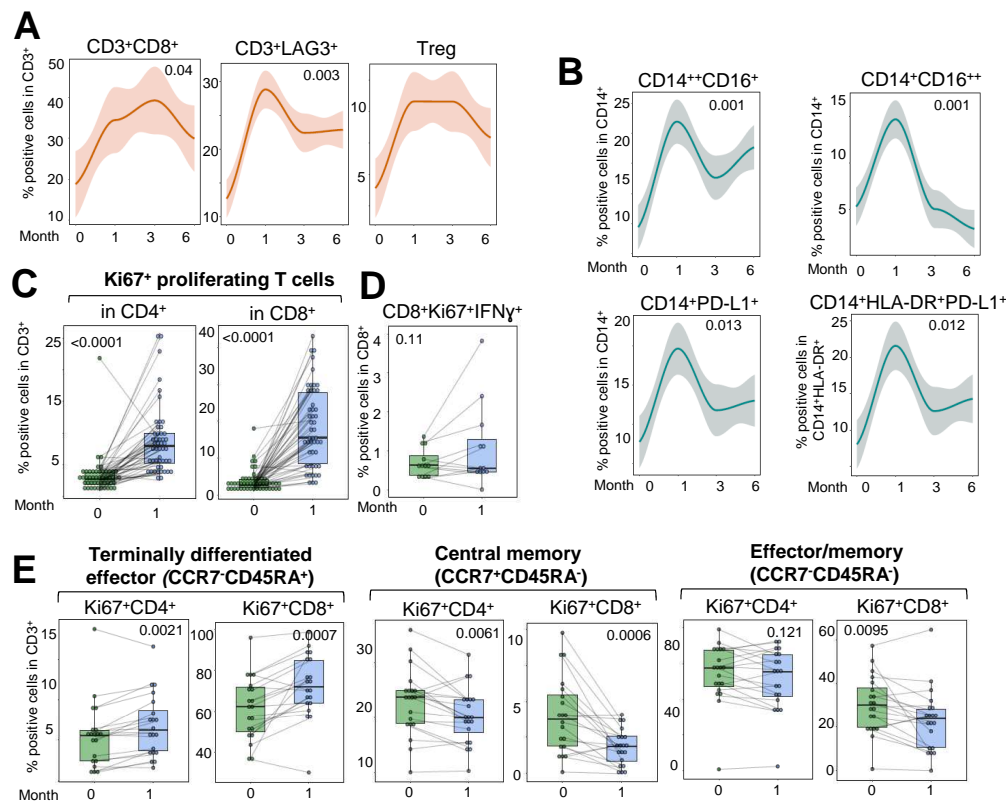

**Supplementary figure. Additional blood immune modulations observed 1 month after Y<sup>90</sup>TARE in HCC patients, as detected by multiparametric flow cytometry.** (A) Treatment-induced increase in the percentage of CD3<sup>+</sup>CD8<sup>+</sup>, activated/exhausted CD3<sup>+</sup>LAG3<sup>+</sup> lymphocytes and regulatory T cells (Treg, CD4<sup>+</sup>CD25<sup>hi</sup>Foxp3<sup>+</sup>), peaking one month after therapy; (B) Treatment-induced increase in PBMC of intermediate (CD14<sup>++</sup>CD16<sup>+</sup>) and non-classical (CD14<sup>+</sup>CD16<sup>++</sup>) monocytes and of activated CD14<sup>+</sup> and HLA-DR<sup>+</sup>CD14<sup>+</sup>PD-L1<sup>+</sup> monocytes, all peaking one month after treatment; (C) Treatment-induced increase of CD4<sup>+</sup> and CD8<sup>+</sup> T cells expressing the proliferative marker Ki67 in post-Y<sup>90</sup>TARE (1 month) vs pre-Y<sup>90</sup>TARE (time 0) PBMC; (D) IFN- $\gamma$  intracellular staining in post-Y<sup>90</sup>TARE (1 month) vs pre-Y<sup>90</sup>TARE (time 0) CD8<sup>+</sup>Ki67<sup>+</sup> cells ( $p > 0.05$ ); (E) Increased frequency in post-Y<sup>90</sup>TARE (1 month) compared to pre-Y<sup>90</sup>TARE (time 0) of Ki67<sup>+</sup>CD4<sup>+</sup> and Ki67<sup>+</sup>CD8<sup>+</sup> T cells expressing a terminally differentiated effector (CCR7<sup>-</sup>CD45RA<sup>+</sup>) phenotype; decrease in both memory (central, CCR7<sup>+</sup>CD45RA<sup>-</sup>) and effector (CCR7<sup>-</sup>CD45RA<sup>-</sup>) subsets. For statistical analyses the Friedman (A, B) and Wilcoxon (C-E) tests were applied. Statistical significance was set at  $p < 0.05$ .
